# Supplementary material for: Matured Manure and Compost from the Organic Fraction of Solid Waste Digestate Application in Intensive Apple Orchards
Source: MDPI journal article supplement (doi:10.3390/ijerph192315512), 2022-11-23
Supplement: s1 [file s1]

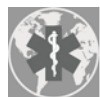

Article

# Matured manure and compost from the organic fraction of solid waste digestate application in intensive apple orchards

Daniela Bona<sup>1\*</sup>, Andrea Cristoforetti<sup>1</sup>, Roberto Zanzotti<sup>1</sup>, Daniela Bertoldi<sup>1</sup>, Nicole Dellai<sup>1</sup>, Silvia Silvestri<sup>1</sup>

<sup>1</sup> Fondazione Edmund Mach, Via E. Mach, 1, 38010 San Michele a/A, Italy

\* Correspondence: daniela.bona@fmach.it

## Supplementary Materials

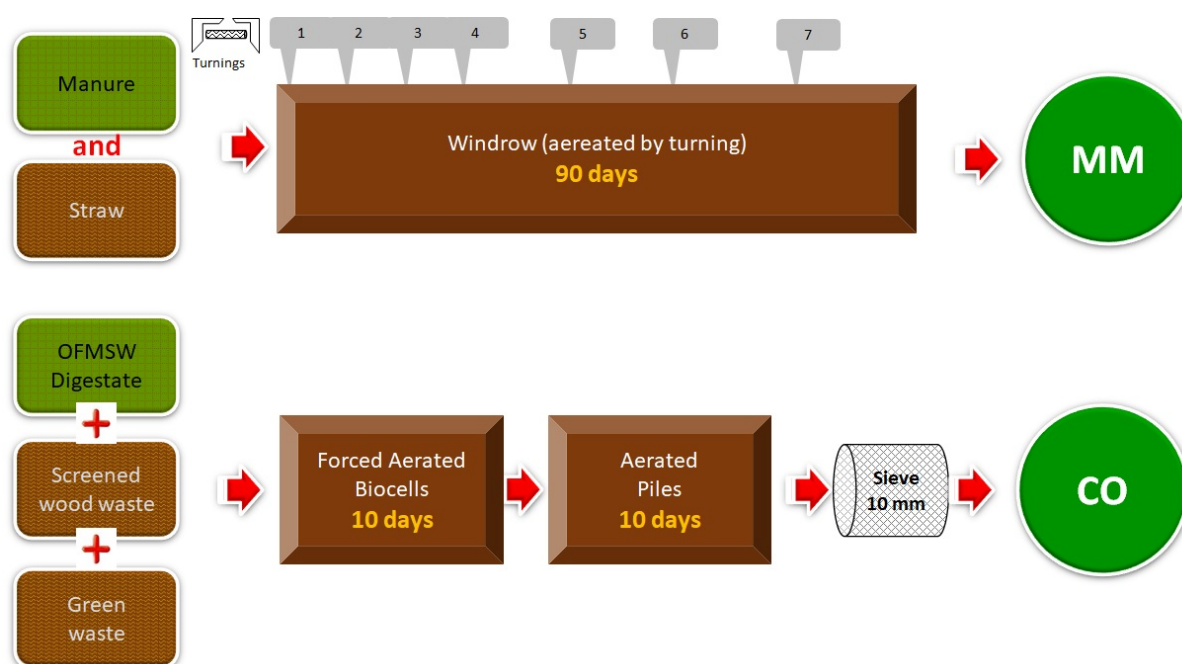

**Figure S1.** Flow chart of the production of the two amendments used in this work. The first flowchart regards the composting of organic fraction of municipal solid waste digestate and the second one the aerobic treatment (maturation) of manure.

**Table S1.** Sampling points: time and description.

| Sampling points | Time         | Description                                                  |
|-----------------|--------------|--------------------------------------------------------------|
| T0              | April 2015   | Phenological apple phase: Bloom                              |
| T1              | October 2015 | Phenological apple phase: post-harvesting                    |
| T2              | June 2016    | Phenological apple phase: growing fruit or “fruit-nut” phase |
| T3              | October 2016 | Phenological apple phase: post-harvesting                    |
| T4              | June 2017    | Phenological apple phase: growing fruit or “fruit-nut” phase |
| T5              | October 2017 | Phenological apple phase: post-harvesting                    |

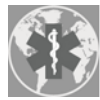

**Table S2.** Weather data for the experimental periods of monitoring. T, mean of the temperature of the month considered. T MIN, the minimum temperature registered during each month considered. T MAX, the maximum temperature registered during each month considered. Rain [mm], the sum of the rainfall for each month considered.

| Year | Month | D1 and D2 |            |            |           | N1     |            |            |           |
|------|-------|-----------|------------|------------|-----------|--------|------------|------------|-----------|
|      |       | T [°C]    | T MIN [°C] | T MAX [°C] | Rain [mm] | T [°C] | T MIN [°C] | T MAX [°C] | Rain [mm] |
| 2015 | 04    | 12,6      | 4,4        | 20,4       | 15,4      | 12,3   | 5,8        | 18,8       | 13        |
| 2015 | 05    | 16,8      | 10,4       | 23,2       | 115,2     | 16,3   | 11         | 22         | 107,8     |
| 2015 | 06    | 20,2      | 13,3       | 27,3       | 98        | 19,7   | 14,1       | 26,4       | 117,4     |
| 2015 | 07    | 25        | 17         | 32,8       | 18,8      | 24,3   | 18,3       | 31,3       | 24,8      |
| 2015 | 08    | 22,5      | 15,8       | 30,1       | 66        | 22     | 16,3       | 28,7       | 61,6      |
| 2015 | 09    | 15,7      | 10,3       | 22,6       | 160       | 15,5   | 10,9       | 21,4       | 124,2     |
| 2015 | 10    | 10,9      | 7,2        | 17,2       | 152,8     | 10,7   | 7,2        | 16         | 143,8     |
| 2015 | 11    | 4,8       | 0,1        | 13,8       | 1         | 5,8    | 1,3        | 13         | 0,6       |
| 2015 | 12    | 0         | -3,7       | 7,7        | 0         | 1,8    | -2         | 8,7        | 0         |
| 2016 | 01    | -0,4      | -4,3       | 6,4        | 30,8      | 0,6    | -3         | 5,9        | 23,2      |
| 2016 | 02    | 3,8       | -0,2       | 9,5        | 125,2     | 3,9    | 0,4        | 8,2        | 125,8     |
| 2016 | 03    | 7,6       | 1,5        | 14,5       | 75,4      | 7,3    | 2,5        | 13,1       | 75,4      |
| 2016 | 04    | 13,2      | 6,9        | 19,7       | 79        | 12,5   | 7,3        | 18,4       | 35,8      |
| 2016 | 05    | 14,6      | 8          | 20,7       | 137,4     | 14,3   | 9          | 19,8       | 134,2     |
| 2016 | 06    | 19,4      | 13,6       | 25,7       | 113,6     | 18,9   | 13,8       | 24,9       | 83,6      |
| 2016 | 07    | 21,8      | 15,5       | 28,7       | 96,2      | 21,5   | 16,3       | 27,8       | 96,8      |
| 2016 | 08    | 20,4      | 14,1       | 27,7       | 70,2      | 20,3   | 14,8       | 26,9       | 84,6      |
| 2016 | 09    | 18,7      | 12,4       | 27         | 22,8      | 18,5   | 13,4       | 25,3       | 20,6      |
| 2016 | 10    | 10,6      | 5,9        | 17,5       | 68,2      | 10,4   | 6,5        | 15,8       | 55,2      |
| 2016 | 11    | 5,3       | 1,9        | 10,8       | 104,8     | 5,3    | 2,4        | 9,5        | 85,8      |
| 2016 | 12    | -0,2      | -4,3       | 8,8        | 2,6       | 1,5    | -2,6       | 8,9        | 0         |
| 2017 | 01    | -2,7      | -8,1       | 5,9        | 3         | -1,6   | -6,2       | 4,4        | 1,6       |
| 2017 | 02    | 4,1       | -0,3       | 10,7       | 84        | 4,3    | 0,8        | 9,3        | 76,8      |
| 2017 | 03    | 10        | 2,7        | 18,5       | 27,6      | 10     | 4,2        | 16,8       | 27,6      |
| 2017 | 04    | 11,9      | 4,3        | 19,8       | 61,6      | 11,7   | 5,8        | 18,1       | 47,6      |
| 2017 | 05    | 16,8      | 9,6        | 24,3       | 76,6      | 16,1   | 10,4       | 22,6       | 74,4      |
| 2017 | 06    | 21,6      | 14,1       | 28,8       | 113,2     | 21,1   | 15,1       | 27,4       | 129,8     |
| 2017 | 07    | 22        | 14,3       | 29,6       | 82,6      | 21,5   | 15,1       | 28,1       | 67,6      |
| 2017 | 08    | 21,7      | 14,6       | 29,9       | 194,2     | 21,4   | 15,3       | 28,4       | 218,2     |
| 2017 | 09    | 14,9      | 10         | 21,3       | 125,8     | 14,3   | 10         | 19,7       | 145,2     |
| 2017 | 10    | 10,5      | 4,4        | 19,9       | 10        | 11,4   | 6,1        | 18,4       | 12,8      |



**Table S3.** Heavy metals content of the two products used, compost from digestate (CO) and matured manure (MM).

| Amendments | Cu    | Zn     | Ni    | Pb    | Cd    | Cr    |
|------------|-------|--------|-------|-------|-------|-------|
|            | mg/kg | mg/kg  | mg/kg | mg/kg | mg/kg | mg/kg |
| MM         | 49.77 | 182.77 | 5.61  | 2.17  | <1    | --    |
| CO         | 97    | 168.75 | 16.13 | 31.65 | 0.75  | <0.05 |
